# Supplementary material for: An Assemblable, Multi-Angle Fluorescence and Ellipsometric Microscope
Source: PubMed Central journal article supplement (PMC5132209; doi:10.1371/journal.pone.0166735), 2016-12-01
Supplement: pone.0166735.s004.pdf [file pone.0166735.s004.pdf]

# SUPPORTING INFORMATION S3 FILE FOR: AN ACCESSIBLE-TO-BUILD, MULTI-ANGLE FLUORESCENCE AND ELLIPSOMETRIC MICROSCOPE

VICTORIA NGUYEN, JOHN RIZZO, BABAK SANII

## CONTENTS

|                                                                      |   |
|----------------------------------------------------------------------|---|
| Resolution vs. variously priced tube lenses                          | 1 |
| Combining slices of oblique images to create a single focussed image | 2 |
| Map of P vs. A increased ellipsometric sensitivity                   | 3 |

## RESOLUTION VS. VARIOUSLY PRICED TUBE LENSES

Three tube lenses of different price ranges were selected for the analysis and are listed in Table 1. As a measure of imaging resolution we tested the effect of each tube lens on the microscope's point spread function.

| <b>Tube lens</b> | <b>Description</b>       | <b>Cost</b> |
|------------------|--------------------------|-------------|
| ITL200           | Infinity corrected       | \$450       |
| AC508200         | Fused doublet lens       | \$125       |
| LA1979           | Single plano-convex lens | \$27        |

TABLE 1. 200mm focal length tube-lenses analyzed, as purchased from Thorlabs

In order to determine the point spread function, we deposited a 1:100 dilution of 0.5  $\mu\text{m}$  fluorescent beads onto a glass slide. 0.5  $\mu\text{m}$  is smaller than the resolution of the microscope at 10X, and thus the spread of the image of the beads will be a suitable approximation of the relative point spread functions.

We then used ImageJ to determine the intensity profile across a single bead with each tube lens. The intensity profile was fitted to a Gaussian curve using non-linear least squares fitting implemented in Excel. The width of a fluorescent bead at the point where its intensity is half of the maximum intensity, called the Full Width at Half Maximum (FWHM), is then used to characterize the point-spread-function and also serves as a short-hand measure of resolution.

There was a significant difference in the resolution of the microscope between the more expensive ITL2000 infinity-corrected tube lens and the cheaper AC508200 and LA1979 tube lenses when they were used with the same Nikon 10X objective (Figure 1).

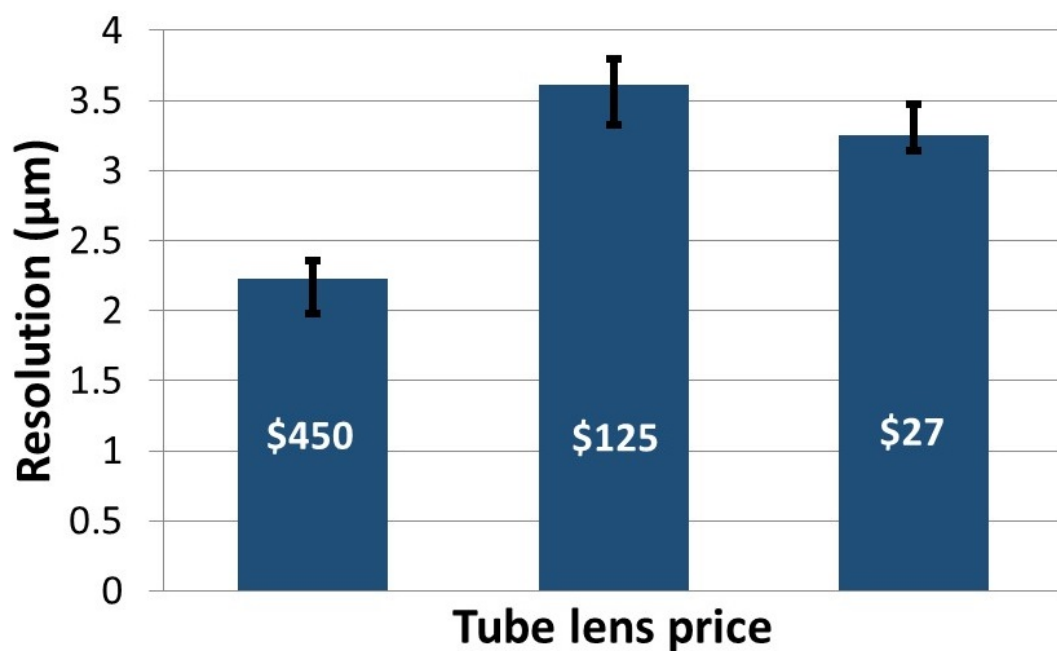

FIGURE 1. System resolution with the ITL200, AC508200 and LA1979 tube lenses, in FWHM  $\mu\text{m}$ . Prices of the three lenses are listed.

#### COMBINING SLICES OF OBLIQUE IMAGES TO CREATE A SINGLE FOCUSED IMAGE

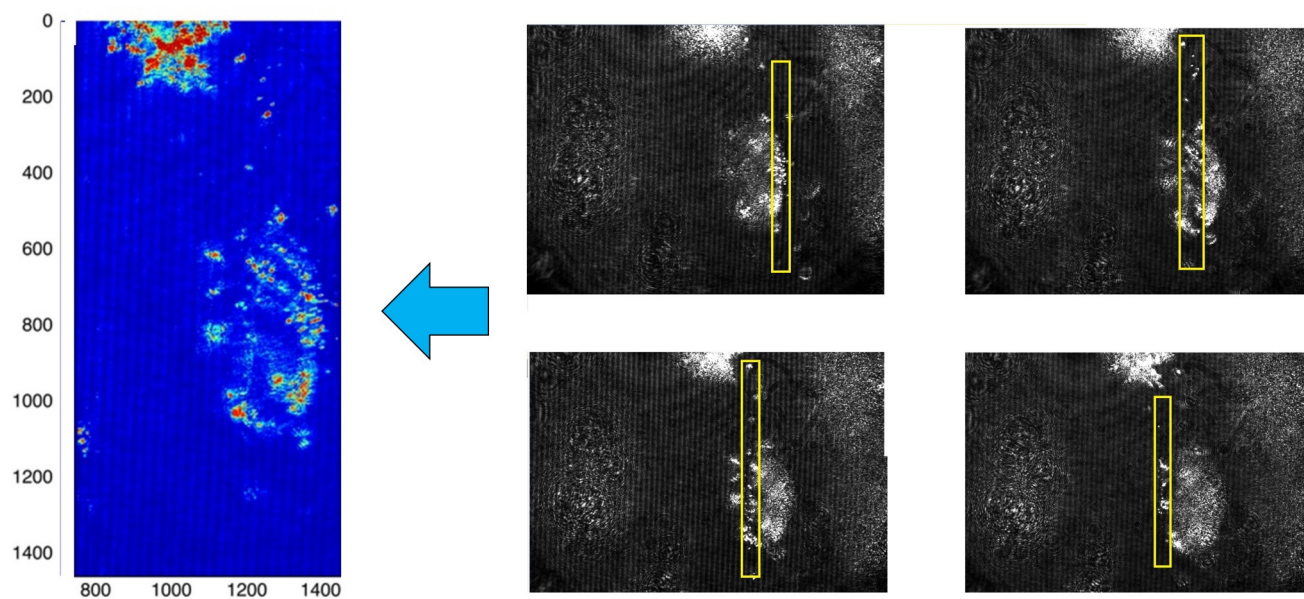

FIGURE 2. A stack of ellipsometric contrast images were taken at a focus points across the sample (dust on Si, in air). Due to oblique incidence (60 degrees) only a portion of each image is in focus (e.g., four images on right). Slices of each image were aggregated to produce a single focussed image (left).

## MAP OF P VS. A INCREASED ELLIPSOMETRIC SENSITIVITY

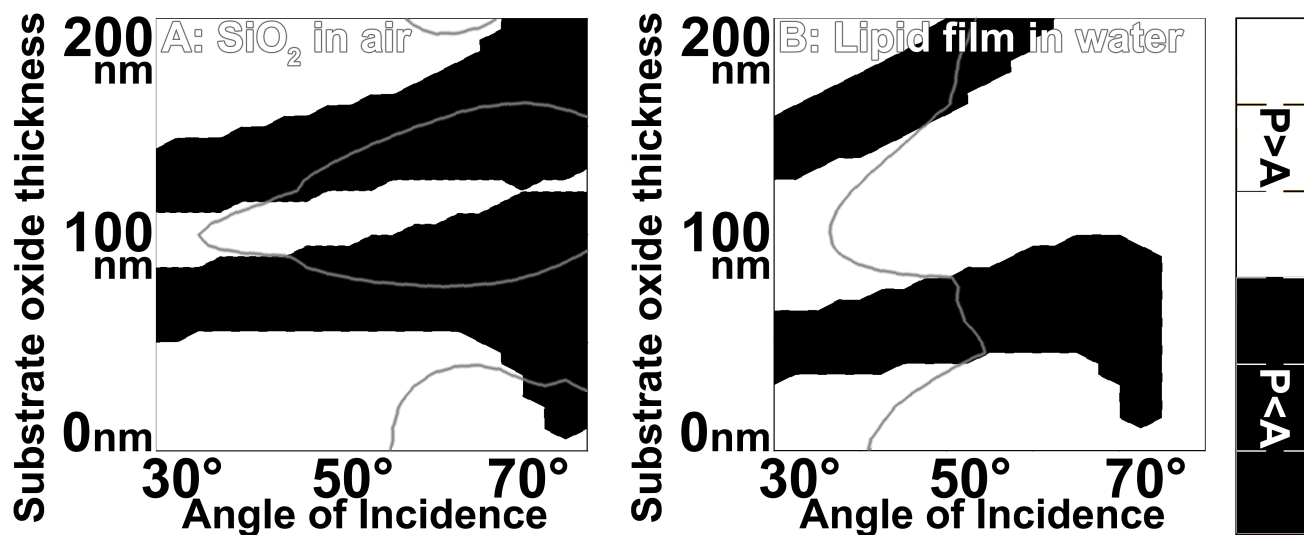

FIGURE 3. When optimizing ellipsometry sensitivity with angle of incidence and substrate oxide thickness (e.g., Fig. 3 of main text), in different regions P is more sensitive than A, noted here by black/white. Gray line corresponds to greater than 0.5 degrees per nm. **a**: P vs. A sensitivity advantage for 1nm of additional Silicon oxide in air **b**: P vs. A sensitivity advantage for 1nm of lipid material in water
