# Supplementary figures and images for: An Assemblable, Multi-Angle Fluorescence and Ellipsometric Microscope
Source: PLOS journal article supplement (doi:10.1371/journal.pone.0166735), 2016-12-01

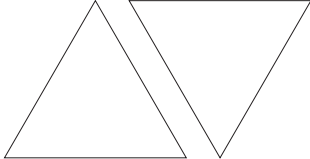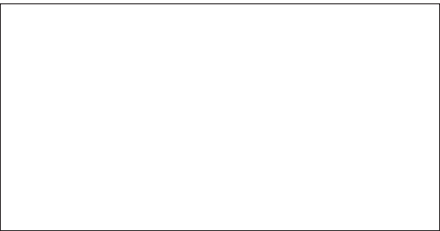

Supplement: S2 (10.1371/journal.pone.0166735.s002) [file journal.pone.0166735.s002]

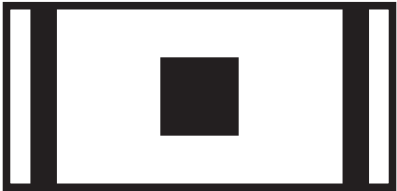

Supplement: S2 (10.1371/journal.pone.0166735.s002) [file journal.pone.0166735.s002]
